# Supplementary material for: Synthesis and mononuclear complexes of the bis-bidentate ligand2,5-di(2-pyridyl)-1,3,4-thiadiazole (dptd): spin crossover in [FeII(dptd)2(NCSe)2] and [FeII(dptd)2(NCBH3)2]·H2O
Source: Royal Society of Chemistry journal article supplement (doi:10.1039/c1dt11396h), 2011-11-30
Supplement: c1dt11396h.pdf [file c1dt11396h.pdf]

**Electronic Supplementary Information (ESI)**

**Synthesis and mononuclear complexes of the bis-bidentate ligand  
2,5-di-(2-pyridyl)-1,3,4-thiadiazole (dptd): spin crossover in  
[Fe<sup>II</sup>(dptd)<sub>2</sub>(NCSe)<sub>2</sub>] and [Fe<sup>II</sup>(dptd)<sub>2</sub>(NCBH<sub>3</sub>)<sub>2</sub>]·H<sub>2</sub>O**

**Julia Klingele,<sup>\*a</sup> Dominic Kaase,<sup>a</sup> Marco H. Klingele<sup>a</sup> and Jochen Lach<sup>b</sup>**

<sup>a</sup> *Institut für Anorganische und Analytische Chemie, Albert-Ludwigs-Universität Freiburg, Albertstr. 21, D-79104 Freiburg, Germany; E-mail: julia.klingele@ac.uni-freiburg.de; Fax: +49-(0)761-203-6001.*

<sup>b</sup> *Institut für Anorganische Chemie, Universität Leipzig, Johannisallee 29, D-04103 Leipzig, Germany.*

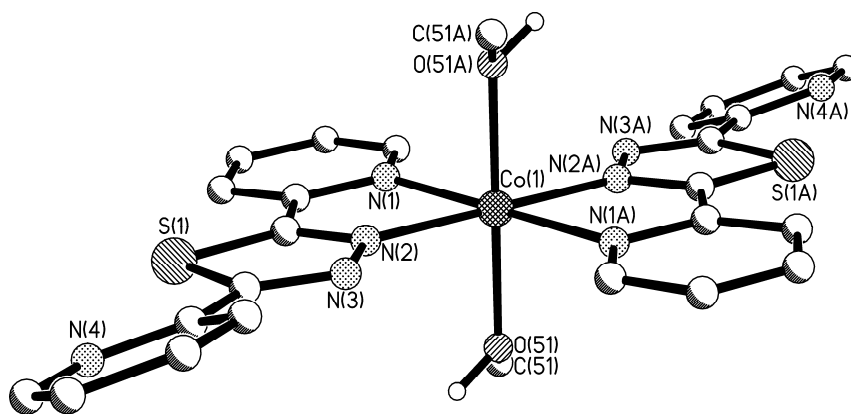

**Fig. S1.** View of the molecular structure of the complex cation of  $[\text{Co}^{\text{II}}(\text{dptd})_2(\text{MeOH})_2](\text{ClO}_4)_2$  (**7**). Hydrogen atoms, except those of the MeOH co-ligands, have been omitted for clarity. Symmetry operation to used to generate equivalent atoms: (A)  $-x, -y, -z$ .

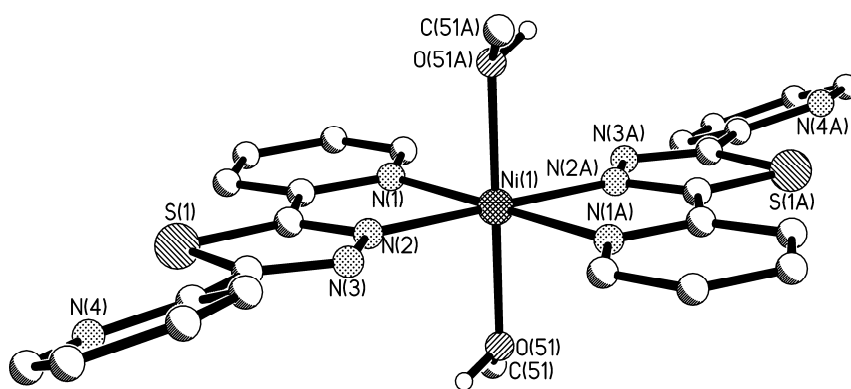

**Fig. S2.** View of the molecular structure of the complex cation of  $[\text{Ni}^{\text{II}}(\text{dptd})_2(\text{MeOH})_2](\text{ClO}_4)_2$  (**8**). Hydrogen atoms, except those of the MeOH co-ligands have been omitted for clarity. Symmetry operation to used to generate equivalent atoms: (A)  $-x+1, -y+1, -z+1$ .

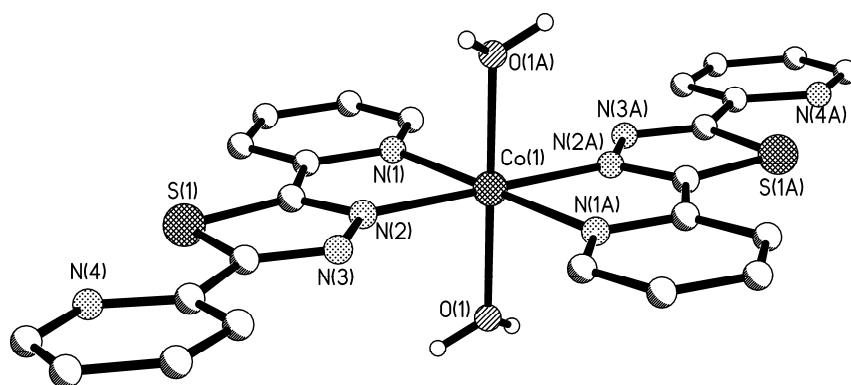

**Fig. S3.** View of the molecular structure of the complex cation of  $[\text{Co}^{\text{II}}(\text{dptd})_2(\text{H}_2\text{O})_2](\text{ClO}_4)_2 \cdot 0.5\text{H}_2\text{O} \cdot \text{dptd}$  (**10**· $0.5\text{H}_2\text{O}$ ·**dptd**). Hydrogen atoms, except those of the  $\text{H}_2\text{O}$  co-ligands, have been omitted for clarity. Symmetry operation to used to generate equivalent atoms: (A)  $-x, -y, -z$ .

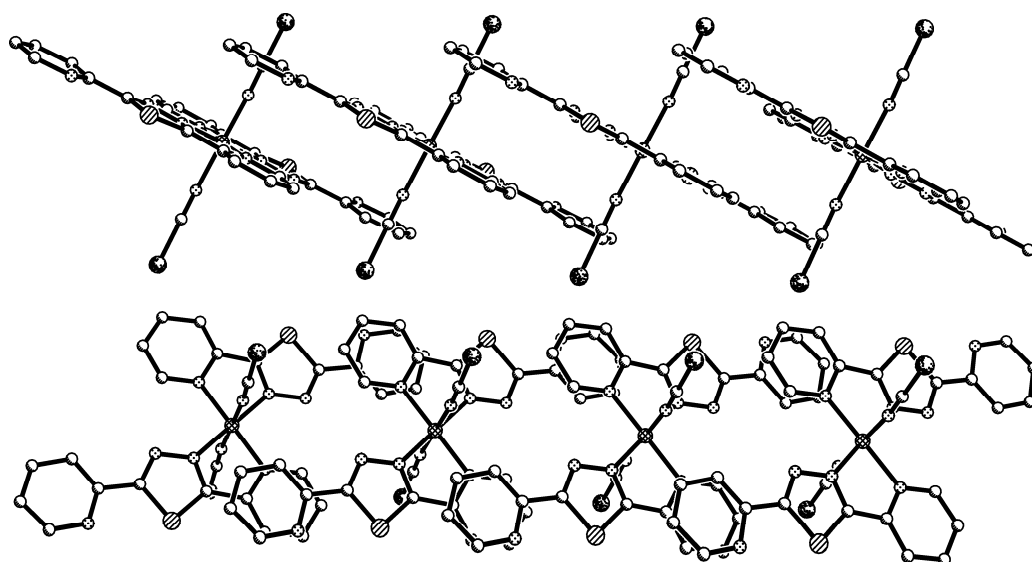

**Fig. S4.** Side and top views of the crystal structure of  $2 \cdot 1.5\text{DCM} \cdot 1.5\text{H}_2\text{O}$ , emphasizing the chain motif running along the  $a$  axis. Hydrogen atoms and solvent molecules have been omitted for clarity.

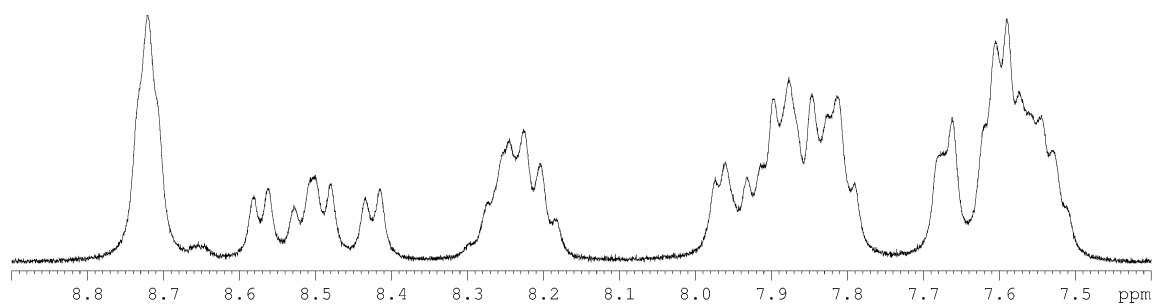

**Fig. S5.** Aromatic region of the  $^1\text{H}$  NMR spectrum of  $[\text{Fe}^{\text{II}}(\text{dptd})_3](\text{OTf})_2 \cdot 1.25\text{DCM} \cdot 0.5\text{H}_2\text{O}$  (5·1.25DCM·0.5H<sub>2</sub>O) in  $\text{MeCN-}d_3$  at 243 K.

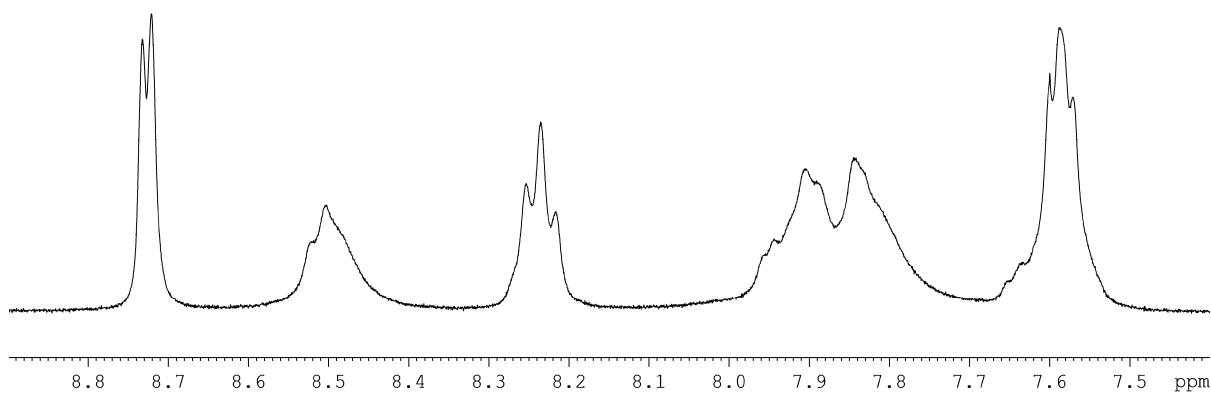

**Fig. S6.** Aromatic region of the  $^1\text{H}$  NMR spectrum of  $[\text{Fe}^{\text{II}}(\text{dptd})_3](\text{ClO}_4)_2 \cdot \text{H}_2\text{O}$  (6·H<sub>2</sub>O) in  $\text{MeCN-}d_3$  at 298 K.

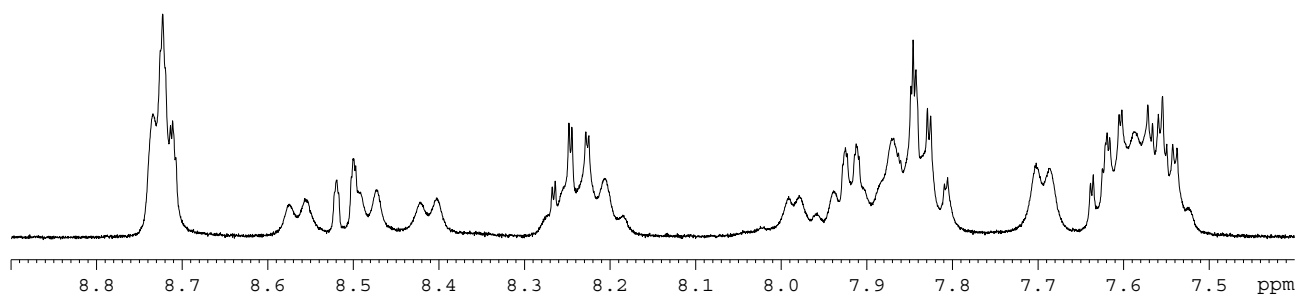

**Fig. S7.** Aromatic region of the  $^1\text{H}$  NMR spectrum of  $[\text{Fe}^{\text{II}}(\text{dptd})_3](\text{ClO}_4)_2 \cdot \text{H}_2\text{O}$  (**6**· $\text{H}_2\text{O}$ ) in  $\text{MeCN-}d_3$  at 273 K.
